# Supplementary material for: Real-World Study on Upper/Lower Respiratory Tract Microbiome Changes in AECOPD and COPD
Source: Research Square preprint supplement (doi:10.21203/rs.3.rs-643177/v1), 2021-06-30
Supplement: Supplementary file 1 [file c3273eaa487e2a9858de588c.xlsx]

## Sheet: Sheet1
Supplementary Table 4: Population-based & Paired-based microbiome differential abundance analysis with p-value ≤ 0.05.
Paired_Group	Type	Study_Type	Taxonomy	Phylum	Class	Order	Family	Genus	baseMean	log2FoldChange	lfcSE	stat	pvalue	padj	Enriched	Depleted
HA	Sputum	paired	OTU-177	Bacteria_unclassified	Bacteria_unclassified	Bacteria_unclassified	Bacteria_unclassified	Bacteria_unclassified	104.458	3.15725	0.313314	10.077	6.98544e-24	1.18054e-21	AECOPD	Healthy
HA	Sputum	paired	OTU-344	Chloroflexi	Anaerolineae	Anaerolineales	Anaerolineaceae	Anaerolineaceae_unclassified	13.0673	5.63169	0.581657	9.68215	3.59099e-22	3.03439e-20	AECOPD	Healthy
HA	Sputum	paired	OTU-350	Chloroflexi	Anaerolineae	Anaerolineales	Anaerolineaceae	uncultured	8.81029	4.77886	0.569599	8.38987	4.86687e-17	2.74167e-15	AECOPD	Healthy
HA	Swab	paired	OTU-1073	Proteobacteria	Gammaproteobacteria	Enterobacterales	Enterobacteriaceae	Raoultella	170.49	10.2211	1.40335	7.28339	3.2554e-13	2.59455e-10	AECOPD	Healthy
HA	Sputum	paired	OTU-209	Bacteroidota	Bacteroidia	Bacteroidia_unclassified	Bacteroidia_unclassified	Bacteroidia_unclassified	15.9308	2.09512	0.315778	6.63479	3.24959e-11	1.37295e-09	AECOPD	Healthy
HA	Sputum	paired	OTU-341	Chloroflexi	Anaerolineae	Anaerolineae_unclassified	Anaerolineae_unclassified	Anaerolineae_unclassified	6.61332	4.49658	0.709427	6.33832	2.32279e-10	7.85104e-09	AECOPD	Healthy
HA	Sputum	paired	OTU-1092	Proteobacteria	Gammaproteobacteria	Gammaproteobacteria_unclassified	Gammaproteobacteria_unclassified	Gammaproteobacteria_unclassified	19.5853	2.75834	0.487774	5.65495	1.55893e-08	4.391e-07	AECOPD	Healthy
HA	Sputum	paired	OTU-1196	Verrucomicrobiota	Verrucomicrobiae	Pedosphaerales	Pedosphaeraceae	Pedosphaeraceae_unclassified	3.11903	3.72366	0.679607	5.47914	4.27387e-08	1.03184e-06	AECOPD	Healthy
HA	Sputum	paired	OTU-435	Desulfobacterota	Desulfobacterota_unclassified	Desulfobacterota_unclassified	Desulfobacterota_unclassified	Desulfobacterota_unclassified	4.20992	4.83591	0.893279	5.41366	6.17488e-08	1.30444e-06	AECOPD	Healthy
HA	Swab	paired	OTU-1121	Proteobacteria	Gammaproteobacteria	Pasteurellales	Pasteurellaceae	Actinobacillus	26.1118	5.4973	1.0556	5.20774	1.91157e-07	7.61762e-05	AECOPD	Healthy
AC	Swab	Population	OTU-1121	Proteobacteria	Gammaproteobacteria	Pasteurellales	Pasteurellaceae	Actinobacillus	17.5709	4.74265	1.01513	4.67195	2.98353e-06	0.000146193	COPD	AECOPD
HA	Sputum	paired	OTU-961	Proteobacteria	Gammaproteobacteria	Burkholderiales	Comamonadaceae	Comamonadaceae_unclassified	6.90149	1.83256	0.435932	4.20378	2.62494e-05	0.000492905	AECOPD	Healthy
AC	Swab	Population	OTU-661	Firmicutes	Negativicutes	Veillonellales-Selenomonadales	Veillonellaceae	Megasphaera	8.91668	-2.33095	0.574296	-4.0588	4.93245e-05	0.00120845	AECOPD	COPD
HC	Swab	paired	OTU-50	Actinobacteriota	Actinobacteria	Actinomycetales	Actinomycetaceae	Actinomyces	40.1187	2.27478	0.481896	4.72049	2.3528e-06	0.00157167	COPD	Healthy
AH	Swab	Population	OTU-999	Proteobacteria	Gammaproteobacteria	Burkholderiales	Neisseriaceae	Alysiella	2.72719	2.21369	0.474955	4.66083	3.14935e-06	0.00305487	Healthy	AECOPD
HA	Sputum	paired	OTU-786	Proteobacteria	Alphaproteobacteria	Alphaproteobacteria_unclassified	Alphaproteobacteria_unclassified	Alphaproteobacteria_unclassified	6.24422	2.62605	0.706881	3.71498	0.000203218	0.00312216	AECOPD	Healthy
HA	Sputum	paired	OTU-649	Firmicutes	Firmicutes_unclassified	Firmicutes_unclassified	Firmicutes_unclassified	Firmicutes_unclassified	9.04653	1.71258	0.460389	3.71985	0.000199338	0.00312216	AECOPD	Healthy
AC	Swab	Population	OTU-663	Firmicutes	Negativicutes	Veillonellales-Selenomonadales	Veillonellaceae	Veillonellaceae_unclassified	5.40883	-2.24695	0.607144	-3.70086	0.000214872	0.00350958	AECOPD	COPD
HA	Sputum	paired	OTU-953	Proteobacteria	Gammaproteobacteria	Burkholderiales	Burkholderiales_unclassified	Burkholderiales_unclassified	25.5903	2.14018	0.587012	3.64589	0.000266465	0.00375271	AECOPD	Healthy
HA	Sputum	paired	OTU-875	Proteobacteria	Alphaproteobacteria	Rhodobacterales	Rhodobacteraceae	Rhodobacteraceae_unclassified	2.71464	3.11393	0.860156	3.62019	0.000294385	0.00382701	AECOPD	Healthy
HA	Sputum	paired	OTU-368	Chloroflexi	KD4-96	KD4-96_or	KD4-96_fa	KD4-96_ge	1.41394	3.07919	0.87682	3.51177	0.000445133	0.00537339	AECOPD	Healthy
HA	Sputum	paired	OTU-13	Acidobacteriota	Acidobacteriae	Bryobacterales	Bryobacteraceae	Bryobacter	2.13166	2.50636	0.725955	3.4525	0.000555408	0.00625759	AECOPD	Healthy
HA	Sputum	paired	OTU-239	Bacteroidota	Bacteroidia	Cytophagales	Microscillaceae	uncultured	3.09419	1.94747	0.587925	3.31244	0.000924857	0.00976881	AECOPD	Healthy
HA	Sputum	paired	OTU-1165	Proteobacteria	Proteobacteria_unclassified	Proteobacteria_unclassified	Proteobacteria_unclassified	Proteobacteria_unclassified	1.97705	2.49393	0.76902	3.243	0.00118278	0.0117582	AECOPD	Healthy
HA	Sputum	paired	OTU-516	Firmicutes	Bacilli	Bacilli_unclassified	Bacilli_unclassified	Bacilli_unclassified	13.2596	1.42818	0.473749	3.01463	0.00257293	0.0228855	AECOPD	Healthy
HA	Sputum	paired	OTU-536	Firmicutes	Bacilli	Lactobacillales	Enterococcaceae	Enterococcaceae_unclassified	2.11345	2.52199	0.833342	3.02636	0.00247519	0.0228855	AECOPD	Healthy
HC	Swab	paired	OTU-49	Actinobacteriota	Actinobacteria	Actinobacteria_unclassified	Actinobacteria_unclassified	Actinobacteria_unclassified	6.99144	2.07005	0.542996	3.81229	0.000137688	0.0229939	COPD	Healthy
HC	Swab	paired	OTU-548	Firmicutes	Bacilli	Lactobacillales	Streptococcaceae	Streptococcus	210.698	2.36627	0.614165	3.85282	0.000116763	0.0229939	COPD	Healthy
HC	Swab	paired	OTU-662	Firmicutes	Negativicutes	Veillonellales-Selenomonadales	Veillonellaceae	Veillonella	122.202	1.7688	0.457581	3.86554	0.000110843	0.0229939	COPD	Healthy
HA	Sputum	paired	OTU-1197	Verrucomicrobiota	Verrucomicrobiae	Pedosphaerales	Pedosphaeraceae	uncultured	2.2229	2.43322	0.812155	2.99601	0.00273542	0.0231143	AECOPD	Healthy
HA	Sputum	paired	OTU-662	Firmicutes	Negativicutes	Veillonellales-Selenomonadales	Veillonellaceae	Veillonella	87.2735	1.66628	0.56873	2.92982	0.00339156	0.027294	AECOPD	Healthy
HA	Swab	paired	OTU-1124	Proteobacteria	Gammaproteobacteria	Pasteurellales	Pasteurellaceae	Haemophilus	18.4993	2.90397	0.755141	3.84559	0.000120262	0.0319495	AECOPD	Healthy
AC	Swab	Population	OTU-541	Firmicutes	Bacilli	Lactobacillales	Lactobacillaceae	Lactobacillus	7.22432	1.73443	0.580736	2.98661	0.00282088	0.0345557	COPD	AECOPD
HA	Swab	paired	OTU-1068	Proteobacteria	Gammaproteobacteria	Enterobacterales	Enterobacteriaceae	Enterobacteriaceae_unclassified	90.3075	4.62019	1.24405	3.71384	0.000204141	0.040675	AECOPD	Healthy
AC	Swab	Population	OTU-258	Bacteroidota	Bacteroidia	Flavobacteriales	Flavobacteriaceae	Capnocytophaga	25.107	1.55129	0.562032	2.76014	0.00577763	0.047184	COPD	AECOPD
AC	Swab	Population	OTU-108	Actinobacteriota	Actinobacteria	Micrococcales	Micrococcaceae	Rothia	38.5429	1.83545	0.652035	2.81495	0.00487842	0.047184	COPD	AECOPD
HA	Sputum	paired	OTU-429	Desulfobacterota	Desulfobacteria	Desulfobacterales	Desulfosarcinaceae	Desulfosarcinaceae_unclassified	4.2686	4.91656	1.83293	2.68234	0.00731082	0.0561604	AECOPD	Healthy
HA	Sputum	paired	OTU-181	Bacteroidota	Bacteroidia	Bacteroidales	Bacteroidetes_vadinHA17	Bacteroidetes_vadinHA17_ge	4.77558	4.95758	1.87962	2.63754	0.00835093	0.0613612	AECOPD	Healthy
HC	Swab	paired	OTU-516	Firmicutes	Bacilli	Bacilli_unclassified	Bacilli_unclassified	Bacilli_unclassified	7.63615	2.38651	0.683729	3.49044	0.00048223	0.064426	COPD	Healthy
AH	Swab	Population	OTU-258	Bacteroidota	Bacteroidia	Flavobacteriales	Flavobacteriaceae	Capnocytophaga	25.107	1.40638	0.368211	3.81949	0.000133729	0.0648586	Healthy	AECOPD
HC	Swab	paired	OTU-1068	Proteobacteria	Gammaproteobacteria	Enterobacterales	Enterobacteriaceae	Enterobacteriaceae_unclassified	16.1959	3.56392	1.04551	3.40878	0.000652547	0.0726503	COPD	Healthy
HA	Sputum	paired	OTU-16	Acidobacteriota	Acidobacteriota_unclassified	Acidobacteriota_unclassified	Acidobacteriota_unclassified	Acidobacteriota_unclassified	1.69732	2.44197	0.982156	2.48633	0.0129068	0.0872497	AECOPD	Healthy
HA	Sputum	paired	OTU-696	Myxococcota	Polyangia	Polyangia_unclassified	Polyangia_unclassified	Polyangia_unclassified	1.83264	2.1585	0.868084	2.48651	0.0129004	0.0872497	AECOPD	Healthy
AC	Swab	Population	OTU-50	Actinobacteriota	Actinobacteria	Actinomycetales	Actinomycetaceae	Actinomyces	40.7117	-1.03399	0.434652	-2.37889	0.0173649	0.0945423	AECOPD	COPD
AC	Swab	Population	OTU-953	Proteobacteria	Gammaproteobacteria	Burkholderiales	Burkholderiales_unclassified	Burkholderiales_unclassified	13.0613	1.44287	0.598977	2.40889	0.0160011	0.0945423	COPD	AECOPD
AC	Swab	Population	OTU-1126	Proteobacteria	Gammaproteobacteria	Pasteurellales	Pasteurellaceae	Pasteurellaceae_unclassified	42.6541	1.91959	0.798962	2.4026	0.0162788	0.0945423	COPD	AECOPD
AC	Swab	Population	OTU-105	Actinobacteriota	Actinobacteria	Micrococcales	Micrococcaceae	Micrococcaceae_unclassified	7.52395	1.95945	0.841512	2.32849	0.0198862	0.0974426	COPD	AECOPD
HA	Sputum	paired	OTU-853	Proteobacteria	Alphaproteobacteria	Rhizobiales	Rhizobiales_unclassified	Rhizobiales_unclassified	2.01549	2.26309	0.93798	2.41273	0.0158338	0.0988911	AECOPD	Healthy
HA	Sputum	paired	OTU-1172	Spirochaetota	Spirochaetia	Spirochaetales	Spirochaetaceae	Spirochaetaceae_unclassified	3.8976	1.74057	0.725164	2.40024	0.0163843	0.0988911	AECOPD	Healthy
HA	Sputum	paired	OTU-1035	Proteobacteria	Gammaproteobacteria	Burkholderiales	TRA3-20	TRA3-20_ge	0.958646	3.08254	1.28424	2.40028	0.0163823	0.0988911	AECOPD	Healthy
AC	Swab	Population	OTU-543	Firmicutes	Bacilli	Lactobacillales	Lactobacillales_unclassified	Lactobacillales_unclassified	84.5331	1.25692	0.54967	2.28667	0.0222149	0.0989572	COPD	AECOPD
HA	Sputum	paired	OTU-179	Bacteroidota	Bacteroidia	Bacteroidales	Bacteroidales_unclassified	Bacteroidales_unclassified	15.4254	0.908104	0.387557	2.34315	0.0191219	0.111434	AECOPD	Healthy
HA	Sputum	paired	OTU-3	Acidobacteriota	Acidobacteriae	Acidobacteriae_unclassified	Acidobacteriae_unclassified	Acidobacteriae_unclassified	1.49602	2.30442	0.995198	2.31554	0.0205833	0.112212	AECOPD	Healthy
HA	Sputum	paired	OTU-749	Patescibacteria	Patescibacteria_unclassified	Patescibacteria_unclassified	Patescibacteria_unclassified	Patescibacteria_unclassified	2.32972	1.59682	0.688758	2.31841	0.0204272	0.112212	AECOPD	Healthy
HA	Sputum	paired	OTU-903	Proteobacteria	Alphaproteobacteria	Sphingomonadales	Sphingomonadaceae	Sphingomonadaceae_unclassified	1.81696	1.89885	0.849669	2.23482	0.0254293	0.134299	AECOPD	Healthy
HA	Sputum	paired	OTU-676	Gemmatimonadota	Gemmatimonadetes	Gemmatimonadales	Gemmatimonadaceae	uncultured	1.37801	1.89603	0.856702	2.21317	0.0268861	0.137689	AECOPD	Healthy
HA	Sputum	paired	OTU-260	Bacteroidota	Bacteroidia	Flavobacteriales	Flavobacteriaceae	Flavobacterium	1.10274	2.88039	1.33363	2.15982	0.0307866	0.153028	AECOPD	Healthy
HA	Sputum	paired	OTU-499	Firmicutes	Bacilli	Bacillales	Bacillaceae	Bacillus	2.2437	1.45566	0.692853	2.10097	0.0356433	0.172106	AECOPD	Healthy
AC	Swab	Population	OTU-961	Proteobacteria	Gammaproteobacteria	Burkholderiales	Comamonadaceae	Comamonadaceae_unclassified	7.60185	1.31372	0.664787	1.97615	0.0481376	0.181442	COPD	AECOPD
AC	Swab	Population	OTU-548	Firmicutes	Bacilli	Lactobacillales	Streptococcaceae	Streptococcus	388.328	0.994476	0.500321	1.98768	0.0468474	0.181442	COPD	AECOPD
CA	Swab	paired	OTU-1068	Proteobacteria	Gammaproteobacteria	Enterobacterales	Enterobacteriaceae	Enterobacteriaceae_unclassified	71.2874	6.11988	1.72017	3.55772	0.000374085	0.224451	AECOPD	COPD
HC	Swab	paired	OTU-543	Firmicutes	Bacilli	Lactobacillales	Lactobacillales_unclassified	Lactobacillales_unclassified	34.0577	1.87864	0.625075	3.00546	0.00265182	0.233614	COPD	Healthy
HC	Swab	paired	OTU-1002	Proteobacteria	Gammaproteobacteria	Burkholderiales	Neisseriaceae	Neisseriaceae_unclassified	50.9743	-2.92834	0.979663	-2.98912	0.00279778	0.233614	Healthy	COPD
HC	Swab	paired	OTU-209	Bacteroidota	Bacteroidia	Bacteroidia_unclassified	Bacteroidia_unclassified	Bacteroidia_unclassified	7.60859	1.60366	0.56215	2.85273	0.00433458	0.263227	COPD	Healthy
HC	Swab	paired	OTU-669	Fusobacteriota	Fusobacteriia	Fusobacteriales	Fusobacteriaceae	Fusobacterium	57.4552	-1.57821	0.548019	-2.87984	0.00397876	0.263227	Healthy	COPD
HC	Swab	paired	OTU-661	Firmicutes	Negativicutes	Veillonellales-Selenomonadales	Veillonellaceae	Megasphaera	9.47678	2.38437	0.823876	2.89408	0.00380266	0.263227	COPD	Healthy
HC	Swab	paired	OTU-162	Actinobacteriota	Coriobacteriia	Coriobacteriales	Atopobiaceae	Atopobiaceae_unclassified	5.27833	1.81422	0.646552	2.80599	0.00501616	0.279233	COPD	Healthy
HC	Swab	paired	OTU-1001	Proteobacteria	Gammaproteobacteria	Burkholderiales	Neisseriaceae	Neisseria	90.9249	-2.31351	0.860654	-2.68809	0.0071863	0.369265	Healthy	COPD
HC	Swab	paired	OTU-191	Bacteroidota	Bacteroidia	Bacteroidales	Prevotellaceae	Prevotella	283.685	1.53428	0.597392	2.56829	0.01022	0.487642	COPD	Healthy
CA	Sputum	paired	OTU-662	Firmicutes	Negativicutes	Veillonellales-Selenomonadales	Veillonellaceae	Veillonella	86.474	1.85665	0.552342	3.36142	0.00077544	0.498608	AECOPD	COPD
HA	Swab	paired	OTU-1066	Proteobacteria	Gammaproteobacteria	Enterobacterales	Enterobacteriaceae	Citrobacter	4.07235	3.03197	1.03176	2.93862	0.00329674	0.5255	AECOPD	Healthy
AH	Swab	Population	OTU-541	Firmicutes	Bacilli	Lactobacillales	Lactobacillaceae	Lactobacillus	7.22432	1.13297	0.359956	3.14753	0.00164654	0.532383	Healthy	AECOPD
HC	Swab	paired	OTU-258	Bacteroidota	Bacteroidia	Flavobacteriales	Flavobacteriaceae	Capnocytophaga	22.4417	-2.15538	0.862147	-2.50001	0.012419	0.55306	Healthy	COPD
HC	Swab	paired	OTU-177	Bacteria_unclassified	Bacteria_unclassified	Bacteria_unclassified	Bacteria_unclassified	Bacteria_unclassified	21.515	0.789144	0.335215	2.35414	0.0185656	0.62009	COPD	Healthy
HC	Swab	paired	OTU-330	Campilobacterota	Campylobacteria	Campylobacterales	Campylobacteraceae	Campylobacter	14.1705	-1.54272	0.650477	-2.37167	0.0177077	0.62009	Healthy	COPD
HC	Swab	paired	OTU-164	Actinobacteriota	Coriobacteriia	Coriobacteriales	Atopobiaceae	Olsenella	1.34948	2.71994	1.14753	2.37026	0.0177754	0.62009	COPD	Healthy
HC	Swab	paired	OTU-189	Bacteroidota	Bacteroidia	Bacteroidales	Porphyromonadaceae	Porphyromonas	42.9601	-2.21539	0.929469	-2.3835	0.0171489	0.62009	Healthy	COPD
HC	Swab	paired	OTU-194	Bacteroidota	Bacteroidia	Bacteroidales	Prevotellaceae	Prevotellaceae_unclassified	58.5175	0.950977	0.393775	2.41502	0.0157342	0.62009	COPD	Healthy
AH	Swab	Population	OTU-1130	Proteobacteria	Gammaproteobacteria	Pseudomonadales	Moraxellaceae	Psychrobacter	3.19622	1.7699	0.589317	3.0033	0.00267065	0.647633	Healthy	AECOPD
CA	Swab	paired	OTU-1121	Proteobacteria	Gammaproteobacteria	Pasteurellales	Pasteurellaceae	Actinobacillus	56.9336	3.29529	1.07736	3.05868	0.00222318	0.666953	AECOPD	COPD
HC	Swab	paired	OTU-663	Firmicutes	Negativicutes	Veillonellales-Selenomonadales	Veillonellaceae	Veillonellaceae_unclassified	7.70487	2.3026	1.01116	2.27718	0.0227754	0.724475	COPD	Healthy
AH	Swab	Population	OTU-1039	Proteobacteria	Gammaproteobacteria	Cardiobacteriales	Cardiobacteriaceae	Cardiobacterium	1.76711	1.12236	0.389489	2.88163	0.00395625	0.767512	Healthy	AECOPD
HA	Swab	paired	OTU-505	Firmicutes	Bacilli	Bacillales	Bacillales_unclassified	Bacillales_unclassified	11.9167	2.33088	0.881737	2.64352	0.008205	0.934197	AECOPD	Healthy
HA	Swab	paired	OTU-657	Firmicutes	Negativicutes	Veillonellales-Selenomonadales	Selenomonadaceae	Selenomonas	11.5254	1.49143	0.554428	2.69004	0.00714438	0.934197	AECOPD	Healthy
HA	Swab	paired	OTU-1110	Proteobacteria	Gammaproteobacteria	Oceanospirillales	Halomonadaceae	Halomonas	3.12143	2.5662	1.00247	2.55987	0.0104711	0.950613	AECOPD	Healthy
HA	Swab	paired	OTU-187	Bacteroidota	Bacteroidia	Bacteroidales	Muribaculaceae	Muribaculaceae_ge	3.77748	2.14153	0.839415	2.55122	0.0107347	0.950613	AECOPD	Healthy
CA	Swab	paired	OTU-548	Firmicutes	Bacilli	Lactobacillales	Streptococcaceae	Streptococcus	191.358	1.60612	0.568963	2.82288	0.00475941	0.951881	AECOPD	COPD
HC	Swab	paired	OTU-1124	Proteobacteria	Gammaproteobacteria	Pasteurellales	Pasteurellaceae	Haemophilus	18.1797	-1.77481	0.825154	-2.15089	0.031485	0.956	Healthy	COPD
CA	Sputum	paired	OTU-1122	Proteobacteria	Gammaproteobacteria	Pasteurellales	Pasteurellaceae	Aggregatibacter	6.84374	1.66889	0.845668	1.97346	0.0484436	0.994731	AECOPD	COPD
CA	Sputum	paired	OTU-108	Actinobacteriota	Actinobacteria	Micrococcales	Micrococcaceae	Rothia	128.456	-1.5364	0.627035	-2.45026	0.0142755	0.994731	COPD	AECOPD
HA	Swab	paired	OTU-594	Firmicutes	Clostridia	Lachnospirales	Lachnospiraceae	Lachnoanaerobaculum	6.86093	1.25662	0.631534	1.98979	0.0466138	0.997262	AECOPD	Healthy
HA	Swab	paired	OTU-601	Firmicutes	Clostridia	Lachnospirales	Lachnospiraceae	Lachnospiraceae_unclassified	20.0585	0.920601	0.41799	2.20245	0.0276335	0.997262	AECOPD	Healthy
HA	Swab	paired	OTU-1126	Proteobacteria	Gammaproteobacteria	Pasteurellales	Pasteurellaceae	Pasteurellaceae_unclassified	41.9088	2.01902	0.963012	2.09657	0.036032	0.997262	AECOPD	Healthy
HA	Swab	paired	OTU-510	Firmicutes	Bacilli	Bacillales	Planococcaceae	Planococcaceae_unclassified	34.8357	1.68097	0.755779	2.22415	0.0261383	0.997262	AECOPD	Healthy
HA	Swab	paired	OTU-189	Bacteroidota	Bacteroidia	Bacteroidales	Porphyromonadaceae	Porphyromonas	88.2066	-1.97597	0.983106	-2.00992	0.0444394	0.997262	Healthy	AECOPD
HA	Swab	paired	OTU-548	Firmicutes	Bacilli	Lactobacillales	Streptococcaceae	Streptococcus	376.07	1.19034	0.597658	1.99168	0.0464062	0.997262	AECOPD	Healthy
CA	Swab	paired	OTU-50	Actinobacteriota	Actinobacteria	Actinomycetales	Actinomycetaceae	Actinomyces	32.8064	-1.0208	0.500532	-2.03944	0.0414065	0.999655	COPD	AECOPD
CA	Swab	paired	OTU-189	Bacteroidota	Bacteroidia	Bacteroidales	Porphyromonadaceae	Porphyromonas	36.0415	-1.80067	0.856144	-2.10323	0.0354458	0.999655	COPD	AECOPD
CA	Swab	paired	OTU-1073	Proteobacteria	Gammaproteobacteria	Enterobacterales	Enterobacteriaceae	Raoultella	147.136	7.26868	3.55041	2.04728	0.040631	0.999655	AECOPD	COPD
CA	Swab	paired	OTU-662	Firmicutes	Negativicutes	Veillonellales-Selenomonadales	Veillonellaceae	Veillonella	95.264	0.855917	0.430945	1.98614	0.0470177	0.999655	AECOPD	COPD
HC	Swab	paired	OTU-1126	Proteobacteria	Gammaproteobacteria	Pasteurellales	Pasteurellaceae	Pasteurellaceae_unclassified	30.6446	-1.68451	0.855396	-1.96927	0.0489218	0.999769	Healthy	COPD
HC	Swab	paired	OTU-1157	Proteobacteria	Gammaproteobacteria	Xanthomonadales	Xanthomonadaceae	Stenotrophomonas	1.55536	1.88865	0.932832	2.02464	0.0429041	0.999769	COPD	Healthy
HC	Sputum	paired	OTU-330	Campilobacterota	Campylobacteria	Campylobacterales	Campylobacteraceae	Campylobacter	22.4702	1.23426	0.525437	2.34902	0.0188226	0.999899	COPD	Healthy
HC	Sputum	paired	OTU-1092	Proteobacteria	Gammaproteobacteria	Gammaproteobacteria_unclassified	Gammaproteobacteria_unclassified	Gammaproteobacteria_unclassified	6.80743	1.5043	0.619396	2.42865	0.015155	0.999899	COPD	Healthy
HC	Swab	Population	OTU-1121	Proteobacteria	Gammaproteobacteria	Pasteurellales	Pasteurellaceae	Actinobacillus	17.5709	3.45103	1.05537	3.26997	0.00107558	1	COPD	Healthy
AH	Swab	Population	OTU-1121	Proteobacteria	Gammaproteobacteria	Pasteurellales	Pasteurellaceae	Actinobacillus	17.5709	1.29162	0.624763	2.06738	0.0386985	1	Healthy	AECOPD
HC	Swab	Population	OTU-50	Actinobacteriota	Actinobacteria	Actinomycetales	Actinomycetaceae	Actinomyces	40.7117	-0.892067	0.453822	-1.96568	0.049336	1	Healthy	COPD
AH	Swab	Population	OTU-53	Actinobacteriota	Actinobacteria	Bifidobacteriales	Bifidobacteriaceae	Bifidobacterium	3.45146	0.808455	0.343527	2.3534	0.0186028	1	Healthy	AECOPD
AH	Sputum	Population	OTU-53	Actinobacteriota	Actinobacteria	Bifidobacteriales	Bifidobacteriaceae	Bifidobacterium	4.10552	0.822136	0.386659	2.12626	0.0334818	1	Healthy	AECOPD
AH	Swab	Population	OTU-789	Proteobacteria	Alphaproteobacteria	Caulobacterales	Caulobacteraceae	Brevundimonas	1.96948	1.11588	0.563474	1.98036	0.0476628	1	Healthy	AECOPD
AH	Swab	Population	OTU-840	Proteobacteria	Alphaproteobacteria	Rhizobiales	Rhizobiaceae	Brucella	3.19269	1.2915	0.592051	2.1814	0.0291542	1	Healthy	AECOPD
HC	Swab	Population	OTU-953	Proteobacteria	Gammaproteobacteria	Burkholderiales	Burkholderiales_unclassified	Burkholderiales_unclassified	13.0613	1.32894	0.62402	2.12964	0.0332017	1	COPD	Healthy
AH	Sputum	Population	OTU-258	Bacteroidota	Bacteroidia	Flavobacteriales	Flavobacteriaceae	Capnocytophaga	29.5953	1.01049	0.316834	3.18932	0.00142606	1	Healthy	AECOPD
AH	Swab	Population	OTU-278	Bacteroidota	Bacteroidia	Flavobacteriales	Weeksellaceae	Chryseobacterium	1.57119	1.0555	0.393193	2.68445	0.00726501	1	Healthy	AECOPD
AH	Sputum	Population	OTU-278	Bacteroidota	Bacteroidia	Flavobacteriales	Weeksellaceae	Chryseobacterium	2.68546	0.595341	0.294305	2.02287	0.0430865	1	Healthy	AECOPD
AH	Swab	Population	OTU-961	Proteobacteria	Gammaproteobacteria	Burkholderiales	Comamonadaceae	Comamonadaceae_unclassified	7.60185	1.01752	0.4308	2.36192	0.0181805	1	Healthy	AECOPD
HC	Swab	Population	OTU-536	Firmicutes	Bacilli	Lactobacillales	Enterococcaceae	Enterococcaceae_unclassified	2.38824	2.16403	0.944284	2.29171	0.0219222	1	COPD	Healthy
HC	Swab	Population	OTU-523	Firmicutes	Bacilli	Erysipelotrichales	Erysipelotrichaceae	Erysipelotrichaceae_unclassified	1.20659	2.37944	0.957516	2.48502	0.0129545	1	COPD	Healthy
AH	Swab	Population	OTU-259	Bacteroidota	Bacteroidia	Flavobacteriales	Flavobacteriaceae	Flavobacteriaceae_unclassified	0.620752	1.69303	0.767466	2.206	0.0273838	1	Healthy	AECOPD
HC	Swab	Population	OTU-543	Firmicutes	Bacilli	Lactobacillales	Lactobacillales_unclassified	Lactobacillales_unclassified	84.5331	1.3185	0.573437	2.29929	0.0214885	1	COPD	Healthy
AH	Sputum	Population	OTU-541	Firmicutes	Bacilli	Lactobacillales	Lactobacillaceae	Lactobacillus	8.0589	0.837988	0.406446	2.06174	0.0392324	1	Healthy	AECOPD
AH	Swab	Population	OTU-949	Proteobacteria	Gammaproteobacteria	Burkholderiales	Burkholderiaceae	Lautropia	4.84055	1.10792	0.446026	2.48398	0.0129924	1	Healthy	AECOPD
AH	Sputum	Population	OTU-949	Proteobacteria	Gammaproteobacteria	Burkholderiales	Burkholderiaceae	Lautropia	17.7648	-1.19756	0.539125	-2.2213	0.0263308	1	AECOPD	Healthy
HC	Swab	Population	OTU-661	Firmicutes	Negativicutes	Veillonellales-Selenomonadales	Veillonellaceae	Megasphaera	8.91668	-1.60059	0.594056	-2.69433	0.00705293	1	Healthy	COPD
AC	Sputum	Population	OTU-550	Firmicutes	Bacilli	Mycoplasmatales	Mycoplasmataceae	Mycoplasma	3.99093	1.86389	0.883896	2.10872	0.0349687	1	COPD	AECOPD
AH	Sputum	Population	OTU-550	Firmicutes	Bacilli	Mycoplasmatales	Mycoplasmataceae	Mycoplasma	3.99093	0.931398	0.395207	2.35673	0.0184365	1	Healthy	AECOPD
HC	Swab	Population	OTU-1126	Proteobacteria	Gammaproteobacteria	Pasteurellales	Pasteurellaceae	Pasteurellaceae_unclassified	42.6541	1.8452	0.833493	2.21382	0.0268414	1	COPD	Healthy
AH	Sputum	Population	OTU-1130	Proteobacteria	Gammaproteobacteria	Pseudomonadales	Moraxellaceae	Psychrobacter	3.7389	1.16061	0.492607	2.35606	0.0184698	1	Healthy	AECOPD
HC	Swab	Population	OTU-108	Actinobacteriota	Actinobacteria	Micrococcales	Micrococcaceae	Rothia	38.5429	1.73493	0.679473	2.55334	0.0106695	1	COPD	Healthy
AH	Swab	Population	OTU-752	Patescibacteria	Saccharimonadia	Saccharimonadales	Saccharimonadales_fa	Saccharimonadales_ge	8.30221	-0.49744	0.236551	-2.10288	0.0354759	1	AECOPD	Healthy
HC	Sputum	Population	OTU-525	Firmicutes	Bacilli	Erysipelotrichales	Erysipelotrichaceae	Solobacterium	3.34892	-1.33598	0.581978	-2.29558	0.0216999	1	Healthy	COPD
AH	Swab	Population	OTU-1172	Spirochaetota	Spirochaetia	Spirochaetales	Spirochaetaceae	Spirochaetaceae_unclassified	0.911467	-1.42878	0.585298	-2.44111	0.0146422	1	AECOPD	Healthy
AH	Sputum	Population	OTU-1172	Spirochaetota	Spirochaetia	Spirochaetales	Spirochaetaceae	Spirochaetaceae_unclassified	3.06188	-1.51521	0.526193	-2.87958	0.00398205	1	AECOPD	Healthy
HC	Swab	Population	OTU-548	Firmicutes	Bacilli	Lactobacillales	Streptococcaceae	Streptococcus	388.328	1.11456	0.522322	2.13386	0.0328539	1	COPD	Healthy
HC	Swab	Population	OTU-205	Bacteroidota	Bacteroidia	Bacteroidales	Tannerellaceae	Tannerella	3.58178	-0.83457	0.415761	-2.00733	0.0447143	1	Healthy	COPD
AH	Swab	Population	OTU-1174	Spirochaetota	Spirochaetia	Spirochaetales	Spirochaetaceae	Treponema	9.91225	-0.818458	0.325149	-2.51718	0.0118299	1	AECOPD	Healthy
AH	Sputum	Population	OTU-662	Firmicutes	Negativicutes	Veillonellales-Selenomonadales	Veillonellaceae	Veillonella	130.245	0.90335	0.389339	2.32022	0.0203292	1	Healthy	AECOPD
HC	Swab	Population	OTU-663	Firmicutes	Negativicutes	Veillonellales-Selenomonadales	Veillonellaceae	Veillonellaceae_unclassified	5.40883	-1.91761	0.632658	-3.03105	0.00243707	1	Healthy	COPD
AC	Sputum	Population	OTU-663	Firmicutes	Negativicutes	Veillonellales-Selenomonadales	Veillonellaceae	Veillonellaceae_unclassified	5.03945	-1.33752	0.674573	-1.98277	0.0473929	1	AECOPD	COPD
HC	Sputum	Population	OTU-663	Firmicutes	Negativicutes	Veillonellales-Selenomonadales	Veillonellaceae	Veillonellaceae_unclassified	5.03945	-1.57526	0.714553	-2.20454	0.0274864	1	Healthy	COPD
AH	Swab	Population	OTU-280	Bacteroidota	Bacteroidia	Flavobacteriales	Weeksellaceae	Weeksellaceae_unclassified	2.25106	0.984841	0.404591	2.43416	0.0149262	1	Healthy	AECOPD
AC	Swab	Population	OTU-999	Proteobacteria	Gammaproteobacteria	Burkholderiales	Neisseriaceae	Alysiella	2.72719	2.67841	0.803091	3.33512	0.000852616	NA	COPD	AECOPD
AC	Swab	Population	OTU-162	Actinobacteriota	Coriobacteriia	Coriobacteriales	Atopobiaceae	Atopobiaceae_unclassified	5.26639	-1.12251	0.522787	-2.14717	0.0317801	NA	AECOPD	COPD
AC	Swab	Population	OTU-211	Bacteroidota	Bacteroidia	Chitinophagales	Chitinophagaceae	Chitinophagaceae_unclassified	2.89936	1.38073	0.682618	2.0227	0.043104	NA	COPD	AECOPD
AC	Swab	Population	OTU-574	Firmicutes	Clostridia	Clostridia_unclassified	Clostridia_unclassified	Clostridia_unclassified	4.85077	0.895789	0.418011	2.14298	0.0321146	NA	COPD	AECOPD
AC	Swab	Population	OTU-536	Firmicutes	Bacilli	Lactobacillales	Enterococcaceae	Enterococcaceae_unclassified	2.38824	2.02097	0.923766	2.18775	0.0286877	NA	COPD	AECOPD
AC	Swab	Population	OTU-523	Firmicutes	Bacilli	Erysipelotrichales	Erysipelotrichaceae	Erysipelotrichaceae_unclassified	1.20659	2.86002	0.92856	3.08006	0.00206958	NA	COPD	AECOPD
AC	Swab	Population	OTU-111	Actinobacteriota	Actinobacteria	Micrococcales	Micrococcales_unclassified	Micrococcales_unclassified	2.9454	1.61554	0.783219	2.0627	0.0391415	NA	COPD	AECOPD
AC	Swab	Population	OTU-846	Proteobacteria	Alphaproteobacteria	Rhizobiales	Rhizobiaceae	Rhizobiaceae_unclassified	4.16397	3.1834	1.4903	2.13609	0.0326722	NA	COPD	AECOPD
